# Supplementary material
Source: MDPI journal article supplement (https://www.mdpi.com/2071-1050/13/5/2832)
Supplement: s1 [file s1]

## **Supplementary Information**

**Table S1.** Initial implementation and adaptive management of the ZW model using the i-ZEWATA methodology for the iron and Steel industry in developing countries.

| Steps                        | i-ZEWATA model<br>Implementation Framework<br>Components | Input             | Methods, components,<br>tools, or data as input<br>suggestion                                                                                                                                               | Output                                                    |
|------------------------------|----------------------------------------------------------|-------------------|-------------------------------------------------------------------------------------------------------------------------------------------------------------------------------------------------------------|-----------------------------------------------------------|
| <b>Step 1 Implementation</b> | Formulate ZW goal                                        | Formulate ZW Goal | Company policies, legal requirements and licenses, stakeholder input, social requirements, environmental and sustainability requirements, economic requirements, company operating plan and company outlook | Draft ZW policy and draft procedures.<br>ZW plan outline. |

| <b>Steps</b>                            | <b>i-ZEWATA model<br/>Implementation Framework<br/>Components</b> | <b>Input</b>                                                                                      | <b>Methods, components,<br/>tools, or data as input<br/>suggestion</b>                                                                                                                  | <b>Output</b>                                              |
|-----------------------------------------|-------------------------------------------------------------------|---------------------------------------------------------------------------------------------------|-----------------------------------------------------------------------------------------------------------------------------------------------------------------------------------------|------------------------------------------------------------|
|                                         |                                                                   |                                                                                                   |                                                                                                                                                                                         |                                                            |
| <b>Step 1 Review and<br/>Assessment</b> | <b>Revisit ZW goal</b>                                            | Revisit ZW Goal                                                                                   | Company policies, legal requirements, stakeholder input, social requirements, environmental and sustainability requirements, economic requirements, company operating plan, and outlook | Amend ZW policy and procedures.<br><br>ZW plan review.     |
| <b>Step 2 Implementation</b>            | <b>Determine critical system components</b>                       | Determine the status quo of the critical ZW system components: company culture, waste accounting, | Perform a detailed and exploratory waste system audit and gap analysis to determine the status quo,                                                                                     | Understanding of the critical system component status quo. |

| <b>Steps</b>                            | <b>i-ZEWATA model<br/>Implementation Framework<br/>Components</b> | <b>Input</b>                                                                                                                                                      | <b>Methods, components,<br/>tools, or data as input<br/>suggestion</b>                                                                                                                           | <b>Output</b>                                                                                                                                        |
|-----------------------------------------|-------------------------------------------------------------------|-------------------------------------------------------------------------------------------------------------------------------------------------------------------|--------------------------------------------------------------------------------------------------------------------------------------------------------------------------------------------------|------------------------------------------------------------------------------------------------------------------------------------------------------|
|                                         |                                                                   | environmental externality<br>accounting, regulatory,<br>waste data system, and<br>monitoring protocol.                                                            | representativeness, and<br>accuracy of available critical<br>system components. Apply<br>qualitative and quantitative<br>methods to support the<br>audit.                                        | Develop a plan to address<br>critical system components.<br>Update and align ZW policy<br>and draft procedures.                                      |
| <b>Step 2 Review and<br/>Assessment</b> | <b>Review critical system<br/>components</b>                      | Review the status quo of the<br>critical ZW system<br>requirements: company<br>culture, waste accounting,<br>environmental externality<br>accounting, regulatory, | Perform exploratory and<br>detailed waste system audit<br>and gap analysis to review<br>the status quo,<br>representativeness, and<br>accuracy of available critical<br>system components. Apply | Understanding of the critical<br>system component status<br>quo.<br>Review plans to address<br>gaps, as identified in the<br>initial implementation. |

| Steps                        | i-ZEWATA model<br>Implementation Framework<br>Components                       | Input                                                                                                                                                                     | Methods, components,<br>tools, or data as input<br>suggestion                                                                                                           | Output                                                                                                                      |
|------------------------------|--------------------------------------------------------------------------------|---------------------------------------------------------------------------------------------------------------------------------------------------------------------------|-------------------------------------------------------------------------------------------------------------------------------------------------------------------------|-----------------------------------------------------------------------------------------------------------------------------|
|                              |                                                                                | waste data system, and<br>monitoring protocol.                                                                                                                            | qualitative and quantitative<br>methods to support the<br>audit.                                                                                                        | Develop a plan to address<br>critical system components<br>challenges.<br><br>Update and align ZW policy<br>and procedures. |
| <b>Step 3 Implementation</b> | <b>Determine the status of<br/>baseline information (i-<br/>ZEWATA Step 1)</b> | Determine the status quo of<br>the baseline information:<br>environmental conditions,<br>waste characterization,<br>waste externalities,<br>sustainability practices, and | Specialist reports, local and<br>national government<br>information documents,<br>available EIA's, available<br>waste data, historical data,<br>monitoring data, annual | Identification of baseline<br>information available and the<br>identification of information<br>gaps.                       |

| Steps                                   | i-ZEWATA model<br>Implementation Framework<br>Components | Input                                                                                                                                                                                                                       | Methods, components,<br>tools, or data as input<br>suggestion                                                                                                                                                       | Output                                                                                                                                                               |
|-----------------------------------------|----------------------------------------------------------|-----------------------------------------------------------------------------------------------------------------------------------------------------------------------------------------------------------------------------|---------------------------------------------------------------------------------------------------------------------------------------------------------------------------------------------------------------------|----------------------------------------------------------------------------------------------------------------------------------------------------------------------|
|                                         |                                                          | system integration, and<br>compliance to legal<br>requirements.                                                                                                                                                             | reports, environmental<br>management, sustainability<br>plans, circular economy<br>guidelines and tools, legal<br>register, and compliance<br>status legal documents.                                               | Develop a plan to address<br>baseline data gaps.                                                                                                                     |
| <b>Step 3 Review and<br/>Assessment</b> | <b>Baseline information (i-<br/>ZEWATA Step 1)</b>       | Review the status quo of the<br>baseline information:<br>environmental conditions,<br>waste characterization,<br>waste externalities,<br>sustainability practices, and<br>system integration and<br>compliance requirements | Specialist reports, local and<br>national government<br>information documents,<br>available EIA's, available<br>waste data, circular<br>economy guidelines and<br>tools, historical data,<br>monitoring data, legal | Review of baseline<br>information available and the<br>identification of information<br>gaps.<br><br>Review and update the plan<br>to address baseline data<br>gaps. |

| Steps                                   | i-ZEWATA model<br>Implementation Framework<br>Components      | Input                                                                       | Methods, components,<br>tools, or data as input<br>suggestion | Output                                                                                                                 |
|-----------------------------------------|---------------------------------------------------------------|-----------------------------------------------------------------------------|---------------------------------------------------------------|------------------------------------------------------------------------------------------------------------------------|
|                                         |                                                               |                                                                             | register, and compliance<br>status legal documents.           |                                                                                                                        |
| <b>Step 4 Implementation</b>            | <b>Design components (i-ZEWATA Step 1)</b>                    | i-ZEWATA implementation<br>with input data from VSM<br>three-phase approach | i-ZEWATA analysis (hybrid<br>VSM / AHP / ANP method)          | ZW model for the facility<br><br>ZW model priority criteria<br>and alternatives.                                       |
| <b>Step 4 Review and<br/>Assessment</b> | <b>Review design components<br/>(i-ZEWATA Steps 2a and b)</b> | i-ZEWATA review with input<br>data from VSM three-phase<br>approach         | i-ZEWATA analysis (hybrid<br>VSM / AHP / ANP method)          | Updated ZW model for the<br>facility<br><br>Review the actual state VSM<br>map.<br><br>Update future state VSM<br>map. |

| Steps                 | i-ZEWATA model<br>Implementation Framework<br>Components | Input                                                    | Methods, components,<br>tools, or data as input<br>suggestion                                                                                                                                                                                                                                                | Output                                                                    |
|-----------------------|----------------------------------------------------------|----------------------------------------------------------|--------------------------------------------------------------------------------------------------------------------------------------------------------------------------------------------------------------------------------------------------------------------------------------------------------------|---------------------------------------------------------------------------|
|                       |                                                          |                                                          |                                                                                                                                                                                                                                                                                                              | Updated ZW model priority<br>criteria and alternatives.                   |
| Step 5 Implementation | Operation components<br>(i-ZEWATA Steps 2 a and b)       | Zero waste model's priority<br>criteria and alternatives | Facility management and<br>treatment plan, ZW<br>exchange initiatives and<br>plan, ZW process<br>improvement initiatives,<br>circular economy guidelines<br>and tools, ZW internalization<br>plans, sustainability, and<br>triple bottom line initiatives,<br>site regulatory, and<br>compliance components. | ZW plan with policy and<br>procedures.<br><br>Implementation of the plan. |

| <b>Steps</b>                            | <b>i-ZEWATA model<br/>Implementation Framework<br/>Components</b>           | <b>Input</b>                                          | <b>Methods, components,<br/>tools, or data as input<br/>suggestion</b>                                                                                                                                                                                                | <b>Output</b>   |
|-----------------------------------------|-----------------------------------------------------------------------------|-------------------------------------------------------|-----------------------------------------------------------------------------------------------------------------------------------------------------------------------------------------------------------------------------------------------------------------------|-----------------|
|                                         |                                                                             |                                                       | The outcome of stakeholder consultations.                                                                                                                                                                                                                             |                 |
| <b>Step 5 Review and<br/>Assessment</b> | <b>Operation components<br/>review<br/>(i-ZEWATA Steps 2a and b,<br/>3)</b> | Zero waste model's priority criteria and alternatives | Facility management and treatment plan, waste exchange initiatives, waste process improvement initiatives, waste internalization plans, sustainability, triple bottom line initiatives, circular economy guidelines and requirements, site regulatory, and compliance | Updated ZW plan |

| <b>Steps</b>                            | <b>i-ZEWATA model<br/>Implementation Framework<br/>Components</b> | <b>Input</b>              | <b>Methods, components,<br/>tools, or data as input<br/>suggestion</b> | <b>Output</b>                                                                        |
|-----------------------------------------|-------------------------------------------------------------------|---------------------------|------------------------------------------------------------------------|--------------------------------------------------------------------------------------|
|                                         |                                                                   |                           | components. Stakeholder consultation.                                  |                                                                                      |
| <b>Step 6 Implementation</b>            | <b>Monitoring components<br/>(i-ZEWATA Step 1)</b>                | ZW plan's i-ZW indicators | Audits, monitoring program data, and waste data                        | Developing i-ZW goals. Zero waste system reporting and review requirements and plan. |
| <b>Step 6 Review and<br/>Assessment</b> | <b>Monitoring components<br/>review<br/>(i-ZEWATA Step 1)</b>     | ZW plan's i-ZW indicators | Audits, monitoring program data, and waste data                        | ZW performance review. ZW data and reporting system.                                 |

| Steps                        | i-ZEWATA model<br>Implementation Framework<br>Components                                       | Input                                | Methods, components,<br>tools, or data as input<br>suggestion | Output                                                                                                                                                                                                                                                                                  |
|------------------------------|------------------------------------------------------------------------------------------------|--------------------------------------|---------------------------------------------------------------|-----------------------------------------------------------------------------------------------------------------------------------------------------------------------------------------------------------------------------------------------------------------------------------------|
|                              |                                                                                                |                                      |                                                               |                                                                                                                                                                                                                                                                                         |
| <b>Step 7 Implementation</b> | <b>Adaptive management and<br/>ZW system performance<br/>measurement<br/>(i-ZEWATA Step 1)</b> | ZW performance of i-ZW<br>indicators | i-ZW indicators                                               | Zero waste goal progress.<br><br>Decide on reporting<br>hierarchy following the<br>outcome of ZW system<br>review.<br><br>Prepare to participate in<br>circular economy initiatives<br>such as industrial symbiosis<br>programs.<br><br>Prepare to participate in<br>incentive schemes. |

| <b>Steps</b>                            | <b>i-ZEWATA model<br/>Implementation Framework<br/>Components</b>                         | <b>Input</b>                      | <b>Methods, components,<br/>tools, or data as input<br/>suggestion</b> | <b>Output</b>                                                                                                                                                                                 |
|-----------------------------------------|-------------------------------------------------------------------------------------------|-----------------------------------|------------------------------------------------------------------------|-----------------------------------------------------------------------------------------------------------------------------------------------------------------------------------------------|
|                                         |                                                                                           |                                   |                                                                        | Report on progress relating to regulatory instructions received.                                                                                                                              |
| <b>Step 7 Review and<br/>Assessment</b> | <b>Adaptive management and<br/>ZW system performance<br/>review<br/>(i-ZEWATA Step 1)</b> | ZW performance of i-ZW indicators | i-ZW indicators reporting data                                         | Progress indication of ZW model implementation and CIWM system implementation.<br>Progress indication of participation in circular economy initiatives such as industrial symbiosis programs. |

| Steps | i-ZEWATA model<br>Implementation Framework<br>Components | Input | Methods, components,<br>tools, or data as input<br>suggestion | Output                                                                                                                                     |
|-------|----------------------------------------------------------|-------|---------------------------------------------------------------|--------------------------------------------------------------------------------------------------------------------------------------------|
|       |                                                          |       |                                                               | <p>Progress indication of participation in incentive schemes.</p> <p>Progress indication relating to regulatory instructions received.</p> |

**Table S2.** Industrial waste facility or complex management and waste valorization plan components

| <b>ZW System Management Components</b>                                               | <b>ZW Valorization Management Components</b>                   |
|--------------------------------------------------------------------------------------|----------------------------------------------------------------|
| Geo-Administrative                                                                   | Manufacturing process analysis                                 |
| Socio-cultural aspects                                                               | Waste minimization and waste characterization                  |
| Complex and waste characterization, monitoring and disposal plan                     | Treatment objectives                                           |
| Waste streams and generation rates                                                   | Candidate technology selection protocol                        |
| Waste externalization quantification                                                 | Investigations protocol (bench-scale, pilot-scale)             |
| Waste costs and accounting system                                                    | Preliminary treatment design protocol                          |
| Waste data system and monitoring protocol                                            | Economic comparison protocol                                   |
| Compliance requirements                                                              | Waste exchange protocol and waste stream identification        |
| Company culture components                                                           | Waste internalization protocol and waste stream identification |
| Training                                                                             | Compliance requirements                                        |
| Other environmental, circular economy, CIWM and sustainability monitoring components | Treatment monitoring and data system protocol                  |
